# Supplementary material
Source: Springer Nature journal article supplement (https://www.springermedizin.de/resource/supplementary/12947_2014_510_MOESM4_ESM.pdf/9555914)

# Baseline

**A**

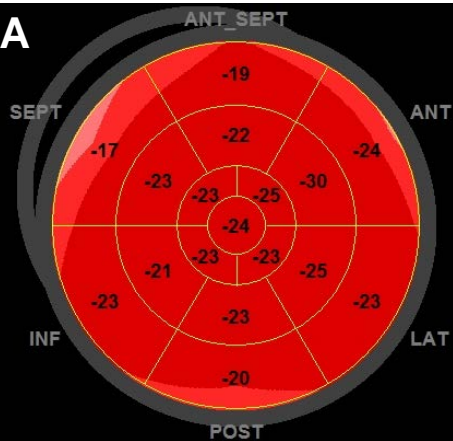

# Follow up

**B**

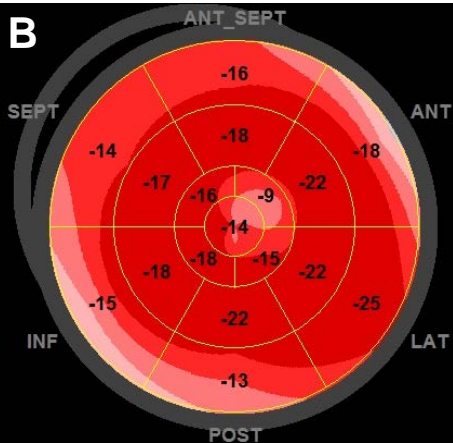

Supplement: MOESM4 [file 9555914]
